# Supplementary material
Source: PubMed Central journal article supplement (PMC8851868)
Supplement: NIHMS1760567-supplement-Supplementary_Information.pdf [file NIHMS1760567-supplement-Supplementary_Information.pdf]

## Supplementary Information Guide

1. **Supplementary Methods.** Additional Methods including a Primer Table providing all oligo sequences and a Transgenic Line Table providing names and references for all transgenic lines used or created.
2. **Supplementary Data File.** Nucleotide sequences of all NTR variants tested, vectors created, and transgenes created.
3. **Supplementary Table 1.** Statistical analysis of graphed components of Fig. 3.
4. **Supplementary Table 2.** Statistical analysis of graphed components of Fig. 4.
5. **Supplementary Table 3.** Statistical analysis of graphed components of Fig. 5.
6. **Supplementary Table 4.** Statistical analysis of graphed components of Fig. 6.
7. **Supplementary Table 5.** Statistical analysis of graphed components of Extended Data Fig. 4.

## Supplementary Methods

### NTR variants – sequence information

The protein accession numbers for the native NTRs used in this study are: NfsB\_Ec = WP\_000351487.1; NfsB\_Vv = WP\_011081872.1; NfsB\_St = WP\_000355874.1; NfsB\_Ck = WP\_047458272.1; NfsB\_Kp = WP\_004178896.1; NfsB\_Pp = WP\_010953384.1; NfsB\_Cs = WP\_004384956.1; FraseI\_Vf = P46072.3; NfsB\_Vh = WP\_005435698.1; YfkO\_Bs = ADE73858.1; YdgI\_Bs = WP\_003225379.1.

DNA sequences and corresponding protein sequences of all engineered NTRs used in this study have been deposited with GenBank. Nucleotide sequences of all NTR variants tested here, as well as vectors created, and transgenes used to create new lines are provided in Supplementary Data File 1.

### NTR variants – sequence comparisons

Amino acid sequence identity cladograms of the eleven NfsB orthologs, grouped according to percent shared amino acid identity with NfsB\_Ec, were generated using the ClustalW2 tool with default settings (<http://www.ebi.ac.uk/Tools/msa/clustalw2/>). Protein alignments were performed using Clustal Omega sequence alignment tool (default settings; <http://www.ebi.ac.uk/Tools/msa/clustalo>).

### NTR variants – cloning

Native NTR candidates were PCR amplified and cloned into the *Nde*I and *Sal*I sites of two plasmids: pUCX (Addgene #60681), for bacterial overexpression assays, and pET28a(+) (Addgene #69864-3), for His<sub>6</sub>-tag protein purification. Engineered gene variants were synthesized as fragments by Twist Bioscience (San Francisco, CA, USA).

For expression in human cells, NTR genes were Phusion<sup>TM</sup> PCR amplified using primers that introduced a mammalian Kozak consensus sequence, a TAG stop codon and Gateway<sup>TM</sup>

(Invitrogen) BP recombination sites. PCR fragments were then recombined into the pDONR221<sup>TM</sup> vector (Invitrogen) using BP Clonase<sup>TM</sup> II enzyme mix (Thermo Fisher Scientific), and subsequently into the F279-V5 mammalian expression destination vector (a Gateway<sup>TM</sup> compatible plasmid which expresses inserted genes from a constitutive CMV promoter and has suppressor read through capabilities to incorporate a V5 epitope at the C-terminus)<sup>59</sup> using LR Clonase<sup>TM</sup> II enzyme mix (Thermo Fisher Scientific).

For expression in zebrafish, NTR genes were PCR amplified from the pET28a(+) vector using primers NfsB\_Vv pTOL2\_Fw and NfsB\_Vv\_Rv, digested with *Xma*I and *Sal*I and cloned into the *Xma*I and *Xho*I (an isoschizomer of *Sal*I) sites of a pTol2-5xUAS-GAP-tagYFP-P2A-*nfsB*\_Ec vector, to swap out the parental *nfsB*\_Ec for the new NTR variants. Note, the P2A element allows equimolar co-expression of the YFP reporter and NTR variants from a single transgene<sup>60</sup>, avoiding possible loss of NTR activity caused by fusion protein oligomerization; the GAP element is a 20 bp dual palmitoylation sequence from the zebrafish *gap43* gene used to target reporters to the plasma membrane.

The pTol2 5xUAS:GAP-ECFP,he:GAP-ECFP plasmid was created by cutting ECFP from a 14xUAS:GAP-ECFP plasmid with *Xma*I and *Bsr*GI and cloning it into the same sites to replace the 5' EYFP reporter in a pTol2-5xUAS:GAP-EYFP,he:GAP-EYFP vector<sup>61</sup>. Similarly, the hatching enzyme promoter (he) driven ECFP “marker” reporter was cut from pTol2-1xUAS-GAP-tagBFP2gi,he:GAP-tagBFP2 with *Cla*I and *Eco*RV and cloned into the same sites to replace the 3' EYFP of the same parent vector<sup>61</sup>. Note, hatching enzyme (*he*) promoter driven “marker” reporters provide a means of tracking germline transmission of UAS and QUAS reporter/effector transgenes in the absence of a Gal4 or QF driver, respectively. Marker reporters are strongly expressed in the hatching gland from 1-3 dpf, then fade since the hatching gland is a temporary structure<sup>61</sup>.

The rho:GAP-tagYFP-P2A-*nfsB*\_Vv F70A/F108Y plasmid was generated by PCR amplifying the 3.7 kb rhodopsin promoter from the rho:YFP-NTR plasmid using primers rho\_promoter\_F2 and rho\_promoter\_R, and cloning it into the *Fse*I and *Sna*BI sites of pTOL2-5xUAS-GAP-tagYFP-P2A-*NfsB*\_Vv F70A-F108Y.

The pTol2 5xUAS:GAP-tagYFP-P2A-*nfsB*\_Vv F70A/F108Y,he:GAP-tagBFP2 plasmid was generated by cutting the he:GAP-tagBFP2 element from pTol2-1xUAS-GAP-tagBFP2gi,he:GAP-tagBFP2 with *Hpa*I and *Eco*RV, and cloning it into the same sites downstream of the NTR 2.0 polyA in the vector pTol2 5xUAS:GAP-tagYFP-P2A-*NfsB*\_Vv F70A/F108Y. The mCherry version, pTol2 5xUAS:GAP-mCherry-P2A-*NfsB*\_Vv F70A/F108Y,he:GAP-tagBFP2, was generated by cloning the *Bsm*BI flanked portion of pTol2-5xUAS-GAP-mCherry-P2A-NTRmut,he:TagRFP into the same sites in the pTol2 5xUAS:GAP-tagYFP-P2A-*NfsB*\_Vv F70A/F108Y,he:GAP-tagBFP2 vector. The EGFP version, pTol2 5xUAS:GAP-EGFP-P2A-*NfsB*\_Vv F70A/F108Y,he:GAP-tagBFP2 was generated by using overlap extension PCR to fuse EGFP amplified with primers *Sbf*I-GFP\_FOR and GFP\_REV (from -6asc11a:EGFP plasmid, kind gift of Dr. Dan Goldman) and 2A-NTR2.0 amplified by FW-P2A and *Kfl*II-Bglobin\_REV (from the pTol2 5xUAS:GAP-tagYFP-P2A-*NfsB*\_Vv F70A/F108Y,he:GAP-tagBFP2 vector), cutting the product with *Sbf*I and *Kfl*II and cloning it into the same sites within the pTol2 5xUAS:GAP-tagYFP-P2A-*NfsB*\_Vv F70A/F108Y,he:GAP-tagBFP2 vector.

The pTol2 5xQUAS:GAP-tagYFP-P2A-NfsB\_Vv F70A/F108Y,he:ECFP vector was created by amplifying the tagYFP to *he* promoter section of the UAS vector with the *MluI*-YFP\_FOR and *AvrII*-He1Pro\_REV primers, digesting with *MluI* and *AvrII* and cloning into the same restriction sites within the pDestT2 QUAS-nls-mApple,he:ECFP plasmid (kindly provided by Marnie Halpern). All relevant primers are listed in the Primer Table below.

### Zebrafish husbandry and transgenic resources

Zebrafish were maintained under standard growth conditions at 28.5 °C in a 10 h dark / 14 h light cycle. All zebrafish were treated in accordance with approved protocols reviewed by the Johns Hopkins Animal Care and Use Committee. Unless otherwise noted, all zebrafish were in the *roy orbison* (*roy*; *mpv17<sup>a9/a9</sup>*) mutant background and treated with 200 nM phenylthiourea (PTU) at 16-24 hours post-fertilization (hpf) to facilitate live imaging and quantification of fluorescent reporters. New zebrafish transgenic lines were created by co-injecting miniTol2-based expression plasmids and 25 pg of Tol2 mRNA into one-cell stage zebrafish embryos and screening for germline transmission. UAS reporter lines, *Tg(5xUAS:GAP-tagYFP-P2A-nfsB\_Vv F70A/F108Y)jh513* and *Tg(5xUAS:GAP-ECFP,he:GAP-ECFP)gmc1913*, were created by injecting into eggs from the *Et(2xNRSE-fos:KALTA4)gmc617* driver line to allow visualization of reporter expression. The *Tg(rho:GAP-tagYFP-P2A-nfsB\_Vv F70A/F108Y)jh405* line was created by injecting into *roy<sup>a9/a9</sup>* eggs. A full list of all zebrafish transgenic lines used or created here, as well as abbreviations used herein, delineation of NTR variant, and references are provided in Transgenic Line Table below.

### Primer Table | Primers used in this study

| <i>Primer Name</i>                                                                        | <i>Sequence (5' → 3')</i>        |
|-------------------------------------------------------------------------------------------|----------------------------------|
| <b><i>Primers for insertion of nitroreductase genes into vectors pUCX and pET28a+</i></b> |                                  |
| NfsB_Vv Fw                                                                                | GGGGCATATGACTATTGTTCAAGCT        |
| NfsB_Vv Rv                                                                                | GGGGTCGACTTAGATTTTCGGTAAAAACAG   |
| NfsB_Ec Fw                                                                                | GGGCATATGGATATCATTTCTG           |
| NfsB_Ec Rv                                                                                | GGGGAATTCCTTACACTTCGGTTAAG       |
| NfsB_Kp_Fw                                                                                | GGGGCATATGGATATCGTATCGGTC        |
| NfsB_Kp_Rv                                                                                | GGGGCTCGAGTTAAATCTCGGTAATGGT     |
| NfsB_Pp_Fw                                                                                | GGGGCATATGGATACCGTATCGCTG        |
| NfsB_Pp_Rv                                                                                | GGGGCTCGAGTCAGAGGAAGGTGAACACTT   |
| NfsB_St_Fw                                                                                | GGGGCATATGGATATCGTTTCTGTC        |
| NfsB_St_Rv                                                                                | GGGGGTCGACTTAGACTTCCGTCAGTG      |
| NfsB_Ck_Fw                                                                                | CCCCCATATGGATATCGTTTCTGTCGC      |
| NfsB_Ck_Rv                                                                                | CCCGTCGACTCAGACTTCCGTCAGGGTG     |
| FraseI_Vf Fw                                                                              | GGGGCATATGACGCATCCAATTATTCA      |
| FraseI_Vf Rv                                                                              | GGGGGTCGACCTAAAGAATGGTAATTAC     |
| NfsB_Vh_Fw                                                                                | CCCCCATATGTCTCATCAAATCATTACAGAC  |
| NfsB_Vh_Rv                                                                                | CCCCTCGAGTTAAAGAGTAGTAATTACGTC   |
| YfkO_Bs_Fw                                                                                | GGGGCATATGGCAGATCTAAAGACACA      |
| YfkO_Bs_Rv                                                                                | CTAGGTCGACTTAAACCCACTTCACAACAT   |
| YdgI_Bs_Fw                                                                                | GGGGCATATGATCAAAACAAACGATTTTATGG |
| YdgI_Bs_Rv                                                                                | GGGGGTCGACTTATTTCCATTCTGCAATTG   |
| NfsB_Cs_Fw                                                                                | CCCCCATATGAACCTTAATGAGATCATTTCG  |
| NfsB_Cs_Rv                                                                                | CCCGTCGACTCAGAGCTGCGTGATCAC      |

| <b><u>Primers for insertion of nitroreductase genes into vector F279-V5</u></b>                               |                                                                            |
|---------------------------------------------------------------------------------------------------------------|----------------------------------------------------------------------------|
| NfsB_Vv GW_Fw                                                                                                 | GGGGACAAGTTTGTACAAAAAAGCAGGCTTCGAAGGAGATAGAACCATGG<br>GCACTATTGTTCAAGCT    |
| NfsB_Vv GW_Rv                                                                                                 | GGGG <u>ACC</u> ACTTTTGTACAAGAAAGCTGGGTCCTAGATTTTCGGTAAA                   |
| NfsB_Ec GW_Fw                                                                                                 | GGGGACAAGTTTGTACAAAAAAGCAGGCTTCGAAGGAGATAGAACCATGG<br>GCGATATCATTCTGTGCCTT |
| NfsB_Ec GW_Rv                                                                                                 | GGGG <u>ACC</u> ACTTTTGTACAAGAAAGCTGGGTCCTACACTTCGGTTAAGGTGAT<br>GT        |
| <b><u>Primers for insertion of nitroreductase variants into vector pTOL2-5xUAS-GAP-tagYFP-P2A-nfsB Ec</u></b> |                                                                            |
| NfsB_Vv pTOL2_Fw                                                                                              | CCCCCGGGCCTATGACTATTGTTCAA                                                 |
| NfsB_Vv_Rv                                                                                                    | GGGGT <u>CGACT</u> TAGATTTTCGGTAAAAACAG                                    |
| <b><u>Primers for insertion of rhodopsin promoter into vector pTOL2-5xUAS-GAP-tagYFP-P2A-nfsB Ec</u></b>      |                                                                            |
| rho_promoter_F2                                                                                               | AATTTAGGGTAATGGCCGGCCCGACCTGCAGGTCAACGG                                    |
| rho_promoter_R                                                                                                | AGTCTACCCTGCT <u>ACG</u> TAGGCTGCGGTTGGATGTGG                              |
| <b><u>Primers for swapping eGFP gene into 5xUAS:YFP-2A-NTR2.0 vector</u></b>                                  |                                                                            |
| SbfI-GFP_FOR                                                                                                  | GCAGCCTGCAGGAAGCACAGCTACAATGATGGTGAGCAAGGGCGAG                             |
| GFP-oe_REV                                                                                                    | <u>CTCCGCTTCCCTTGTACAAGTACTTGTACAGCTCGTCCATGC</u>                          |
| FW-P2A                                                                                                        | <u>TACTTGTACAAGGGAAGCGGAGCTA</u>                                           |
| KflI-Bglobin_REV                                                                                              | CAAGGGT <u>CCCCAA</u> ACTCACC                                              |
| <b><u>Primers for insertion of YFP-2A-NTR 2.0 gene into 5xOUAS vector</u></b>                                 |                                                                            |
| MluI-YFP_FOR                                                                                                  | TTAACGCGTAGCAGGGTAGACTGTAGAGG                                              |
| AvrII-HeIPro_REV                                                                                              | GGCC <u>TAGGG</u> TTGCCTCA                                                 |

*Underlined sequences are restriction, recombination, or overlap extensions.*

## Transgenic Line Table | Transgenic lines used and established in this study

| <b>Individual Transgenic Lines</b>                                                                                                              |            |                                                                          |                    |
|-------------------------------------------------------------------------------------------------------------------------------------------------|------------|--------------------------------------------------------------------------|--------------------|
| <b>Full Transgene Name</b>                                                                                                                      | <b>NTR</b> | <b>Abbreviation (here)</b>                                               | <b>Ref.</b>        |
| <i>Tg(5xUAS:GAP-tagYFP-P2A-nfsB_Vv F70A/F108Y)jh513</i>                                                                                         | 2.0        | <i>UAS:YFP-NTR2.0</i>                                                    | here               |
| <i>Et(2xNRSE-fos:KALTA4)gmc617</i>                                                                                                              | na         | <i>NRSE:KalTA4</i>                                                       | 61                 |
| <i>Tg(5xUAS:GAP-ECFP,he:GAP-ECFP)gmc1913</i>                                                                                                    | na         | <i>UAS:CFP</i>                                                           | here               |
| <i>Tg(14xUAS:nfsB_Ec-mCherry)c264</i>                                                                                                           | 1.0        | <i>UAS:NTR1.0-Cherry</i>                                                 | 62                 |
| <i>Tg(mpeg1.1:EYFP-nfsB_Ec T41Q/N71S/F124T)w202</i>                                                                                             | 1.1        | <i>mpeg:NTR1.1-YFP</i>                                                   | 63                 |
| <i>Tg(rho:EYFP-nfsB_Ec)gmc500</i>                                                                                                               | 1.0        | <i>rho:YFP-NTR1.0</i>                                                    | 64                 |
| <i>Tg(rho:GAP-tagYFP-P2A-nfsB_Vv F70A/F108Y)jh405</i>                                                                                           | 2.0        | <i>rho:YFP-NTR2.0</i>                                                    | here               |
| <i>Tg(mpeg1.1:Gal4-VP16)gl24</i>                                                                                                                | na         | <i>mpeg:Gal4</i>                                                         | 65                 |
| <b>Double Transgenic Lines</b>                                                                                                                  |            |                                                                          |                    |
| <b>Full Transgene Name</b>                                                                                                                      | <b>NTR</b> | <b>Abbreviation (here)</b>                                               | <b>Ref.</b>        |
| <i>Et(2xNRSE-fos:KALTA4)gmc617;</i><br><i>Tg(5xUAS:GAP-tagYFP-P2A-nfsB_Vv F70A/F108Y)jh513</i>                                                  | 2.0        | <i>NRSE:KalTA4;</i><br><i>UAS:YFP-NTR2.0</i>                             | 61<br>here         |
| <i>Et(2xNRSE-fos:KALTA4)gmc617;</i><br><i>Tg(5xUAS:GAP-ECFP,he:GAP-ECFP)gmc1913</i>                                                             | na         | <i>NRSE:KalTA4;</i><br><i>UAS:CFP</i>                                    | 61<br>here         |
| <i>Tg(mpeg1.1:Gal4-VP16)gl24;</i><br><i>Tg(5xUAS:GAP-tagYFP-P2A-nfsB_Vv F70A/F108Y)jh513</i>                                                    | 2.0        | <i>mpeg:Gal4;</i><br><i>UAS:YFP-NTR2.0</i>                               | 65<br>here         |
| <b>Triple Transgenic Lines</b>                                                                                                                  |            |                                                                          |                    |
| <b>Full Transgene Name</b>                                                                                                                      | <b>NTR</b> | <b>Abbreviation (here)</b>                                               | <b>Ref.</b>        |
| <i>Et(2xNRSE-fos:KALTA4)gmc617;</i><br><i>Tg(5xUAS:GAP-tagYFP-P2A-nfsB_Vv F70A/F108Y)jh513;</i><br><i>Tg(5xUAS:GAP-ECFP,he:GAP-ECFP)gmc1913</i> | 2.0        | <i>NRSE:KalTA4;</i><br><i>UAS:YFP-NTR2.0</i><br><i>UAS:CFP</i>           | 61<br>here<br>here |
| <i>Et(2xNRSE-fos:KALTA4)gmc617;</i><br><i>Tg(5xUAS:GAP-tagYFP-P2A-nfsB_Vv F70A/F108Y)jh513;</i><br><i>Tg(14xUAS:nfsB_Ec-mCherry)c264</i>        | 2.0<br>1.0 | <i>NRSE:KalTA4;</i><br><i>UAS:YFP-NTR2.0</i><br><i>UAS:NTR1.0-Cherry</i> | 61<br>here<br>62   |

| New Reporter/Effector Transgenic Lines                              |     |                   |          |      |
|---------------------------------------------------------------------|-----|-------------------|----------|------|
| Full Transgene Name                                                 | NTR | Expression system | Reporter | Ref. |
| <i>Tg(5xUAS:GAP-EGFP-P2A-NfsB_Vv F70A/F108Y,he:tagBFP2)jh551</i>    | 2.0 | Gal4/UAS          | EGFP     | here |
| <i>Tg(5xUAS:GAP-tagYFP-P2A-NfsB_Vv F70A/F108Y,he:tagBFP2)jh552</i>  | 2.0 | Gal4/UAS          | tagYFP   | here |
| <i>Tg(5xUAS:GAP-mCherry-P2A-NfsB_Vv F70A/F108Y,he:tagBFP2)jh553</i> | 2.0 | Gal4/UAS          | mCherry  | here |
| <i>Tg(5xQUAS:GAP-tagYFP-P2A-NfsB_Vv F70A/F108Y,he:ECFP)jh562</i>    | 2.0 | QF/QUAS           | tagYFP   | here |

## References

59. Prosser, G. A. *et al.* Creation and screening of a multi-family bacterial oxidoreductase library to discover novel nitroreductases that efficiently activate the bioreductive prodrugs CB1954 and PR-104A. *Biochem. Pharmacol.* **85**, 1091–103 (2013).
60. Provost, E., Rhee, J. & Leach, S. D. Viral 2A peptides allow expression of multiple proteins from a single ORF in transgenic zebrafish embryos. *Genesis* **45**, 625–629 (2007).
61. Xie, X., Mathias, J. R., Smith, M. A., Walker, S. L., Teng, Y., Distel, M., Köster, R. W., Sirotkin, H. I., Saxena, M. T. & Mumm, J. S. Silencer-delimited transgenesis: NRSE/RE1 sequences promote neural-specific transgene expression in a NRSE/REST-dependent manner. *BMC Biol.* **10**, 93 (2012).
62. Davison, J. M., Akitake, C. M., Goll, M. G., Rhee, J. M., Gosse, N., Baier, H., Halpern, M. E., Leach, S. D. & Parsons, M. J. Transactivation from Gal4-VP16 transgenic insertions for tissue-specific cell labeling and ablation in zebrafish. *Dev. Biol.* **304**, 811–24 (2007).
63. Petrie, T. A., Strand, N. S., Yang, C.-T., Tsung-Yang, C., Rabinowitz, J. S. & Moon, R. T. Macrophages modulate adult zebrafish tail fin regeneration. *Development* **141**, 2581–91 (2014).
64. Walker, S. L., Ariga, J., Mathias, J. R., Coothankandaswamy, V., Xie, X., Distel, M., Köster, R. W., Parsons, M. J., Bhalla, K. N., Saxena, M. T. & Mumm, J. S. Automated reporter quantification in vivo: High-throughput screening method for reporter-based assays in zebrafish. *PLoS One* **7**, e29916 (2012).
65. Ellett, F., Pase, L., Hayman, J. W., Andrianopoulos, A. & Lieschke, G. J. Mpeg1 Promoter Transgenes Direct Macrophage-Lineage Expression in Zebrafish. *Blood* **117**, e49-56 (2011).
